# Supplementary material for: Advanced Computational Biology Methods Identify Molecular Switches for Malignancy in an EGF Mouse Model of Liver Cancer
Source: PLoS One. 2011 Mar 28;6(3):e17738. doi: 10.1371/journal.pone.0017738 (PMC3065454; doi:10.1371/journal.pone.0017738)
Supplement: Table S8 — Experimental validation of predicted binding sites in promoters of up- and downregulated genes. (XLS) [file pone.0017738.s008.xls]

## Sheet: Tabelle1
Gene	Fold change Transgenic	Fold change Tumor	PPAR-gamma	c-Myb	c-Ets-2	STAT5B	GATA-1	Mef2a	p53	HNF-4gamma (alpha -antibody)	GR	C/EBPalpha
Igf2	2.902	25.978	-	+	-			-
Il1rn	2.745	8.49		-	-	+
Igfbp6	0.833	7.837	+	-	+	+
Pparg	0.395	5.756		+	-	+	+	-
Bmp7	0.917	4.637		+	-	-
Zbtb7b	3.69	1.111							+			+
Foxc1	4.667	1.433								+	-	+
Xlr	2.898	0.902						-	+
Erbb3	6.988	2.347	-						+
Itga4	2.7595	1.029							-			+
Th	4.08	1.588						+	-			+
Nr2f1	6.256	2.615							+	+
Defcr6	13.858	6.046								+	-	+
Nr3c1	3.274	1.444							-		-	+
Cav1	5.354	2.494							-		+	+
Sprr2i	3.237	1.59							+			+
Mgp	6.67	3.313						-	-
Fgf18	4.073	2.024	-						+		-
Egf	0.631	0.314							-	+		+
Description
“+” EMSA confirmed predicted site, “-“ predicted site was not confirmed
